# Supplementary material
Source: PubMed Central journal article supplement (PMC1149403)

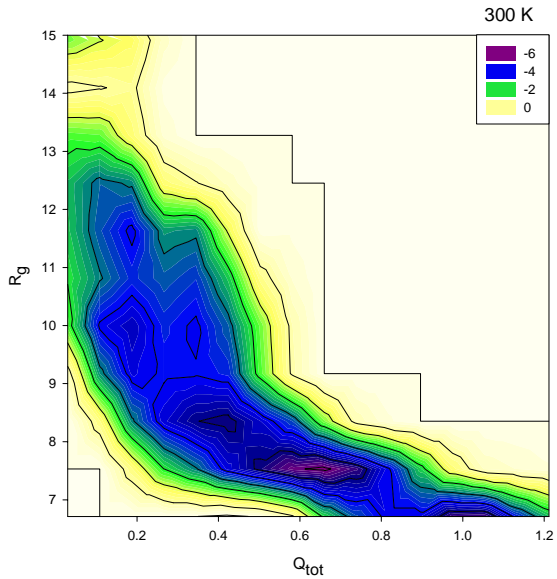

Supplement: pnas_0408653102_2.pdf [file pnas_0408653102_2.pdf]

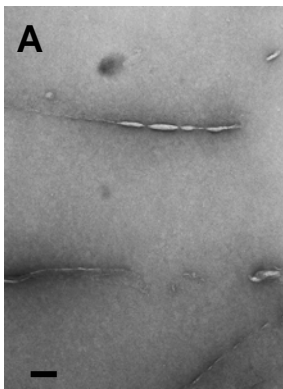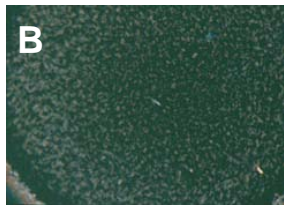

Supplement: pnas_0408653102_3.pdf [file pnas_0408653102_3.pdf]

300 K

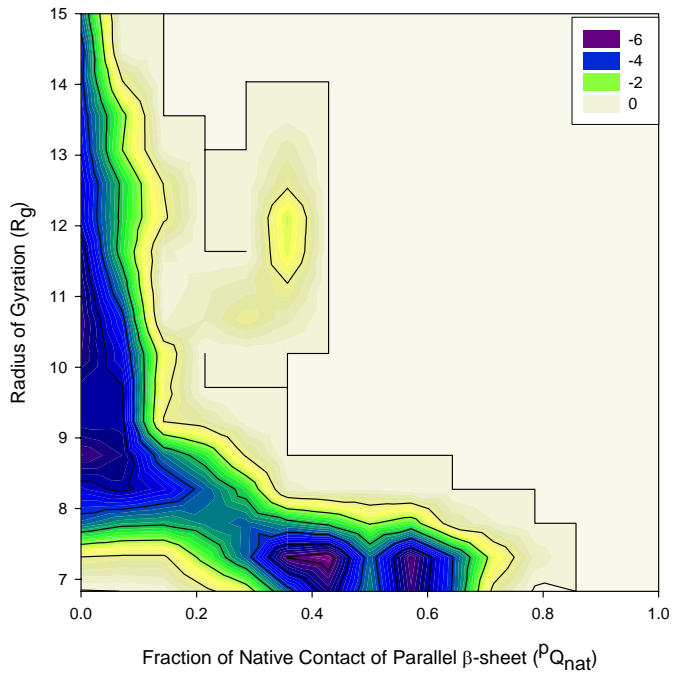

Supplement: pnas_0408653102_4.pdf [file pnas_0408653102_4.pdf]
